# Supplementary material for: Antibodies towards Tyrosine Amyloid-Like Fibrils Allow Toxicity Modulation and Cellular Imaging of the Assemblies
Source: Molecules. 2018 May 26;23(6):1273. doi: 10.3390/molecules23061273 (PMC6100058; doi:10.3390/molecules23061273)
Supplement: Supplementary file 1 [file molecules-23-01273-s001.zip › molecules-293691-SI.pdf]

## Supplementary materials

This file includes:

- **Supplementary figure 1.** Confocal imaging of Tyr assemblies (2 mg/ml).
- **Supplementary figure 2.** Identification of Tyr assemblies' building block.
- **Supplementary figure 3.** Unassembled Tyr solution.
- **Supplementary methods**

## Supplementary results

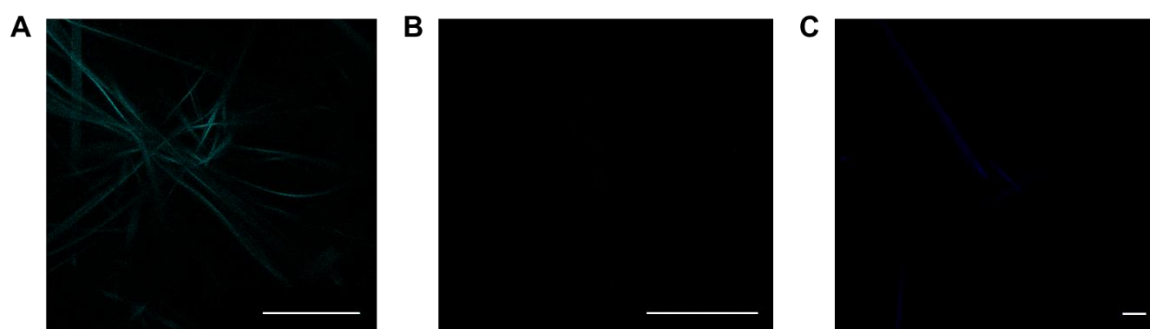

**Supplementary figure 4.** Confocal imaging of Tyr assemblies (2 mg/ml). (A) Tyr assemblies stained with ThT dye. (B) Tyr assemblies without ThT dye. (C) Tyr assemblies stained with Hoechst 33342 dye. Scale bars: 20  $\mu\text{m}$

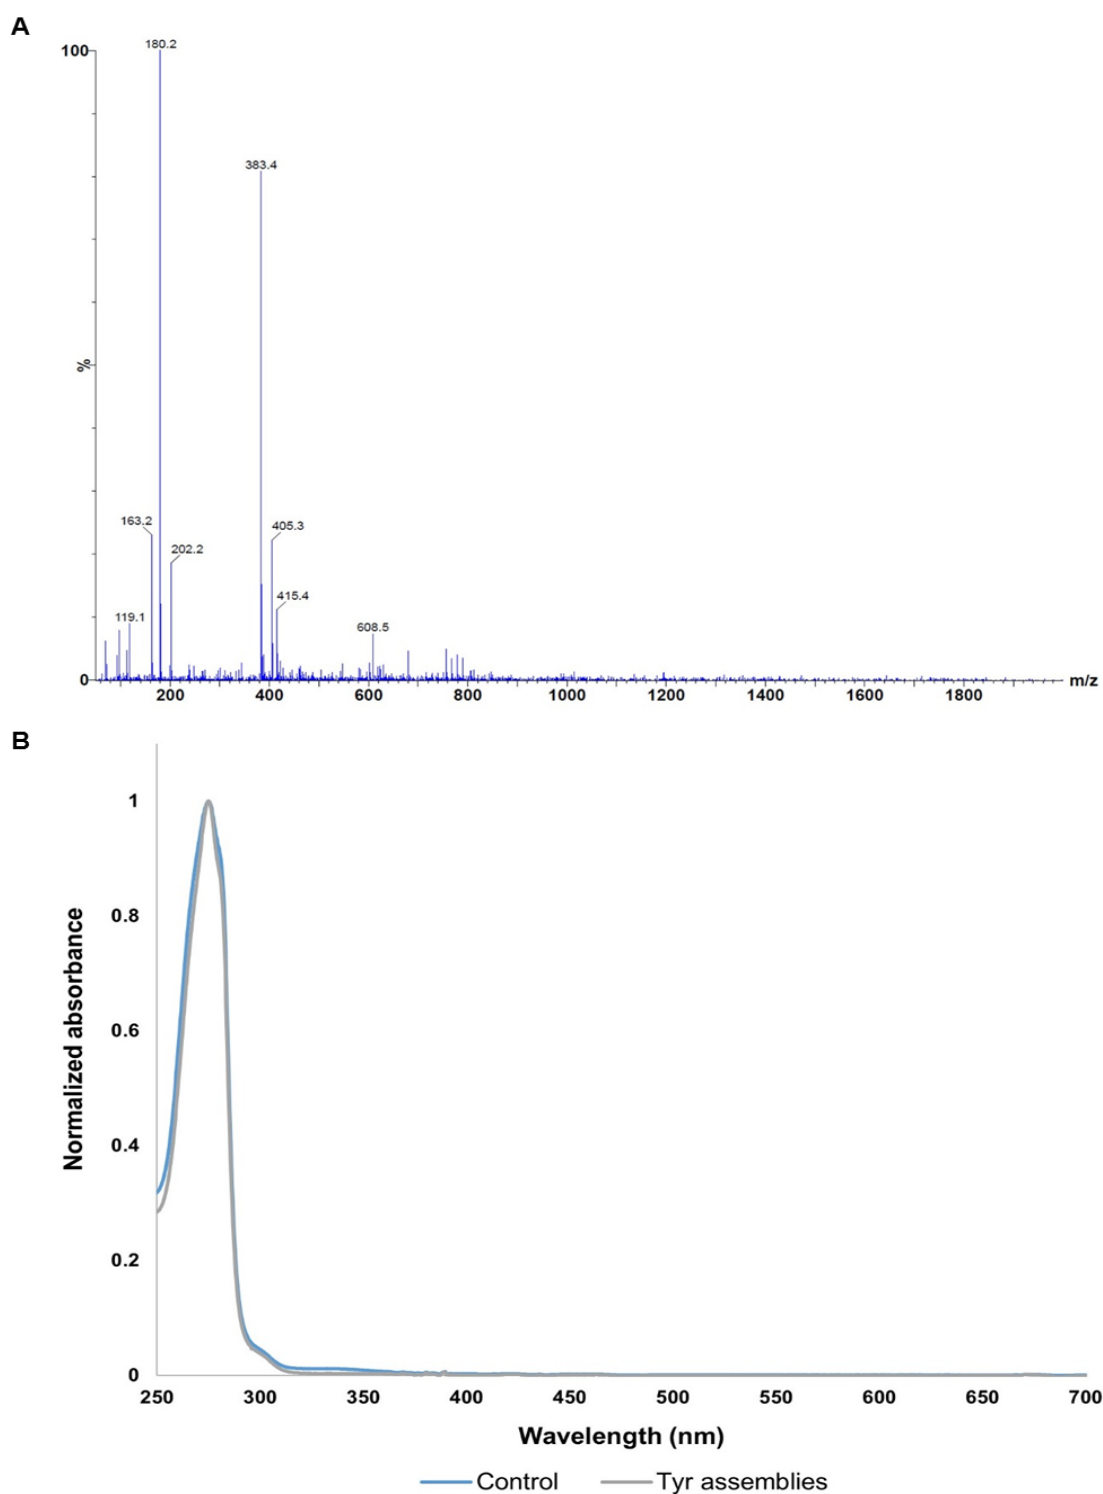

**Supplementary figure 5.** Identification of Tyr assemblies' building block. **(A)** Mass spectroscopy of Tyr assemblies. Dominant mass peaks: 180.2 – Tyr, 384.3 – Tyr dimer with sodium. Minor mass peaks: 163.2 – Tyr without amine group, 202.2 – Tyr with sodium, 405.3 – Tyr dimer with two sodium ions. **(B)** UV-Vis spectra of Tyr assemblies. Solubilized Tyr assemblies (grey) and unassembled Tyr used as a control (blue) are shown.

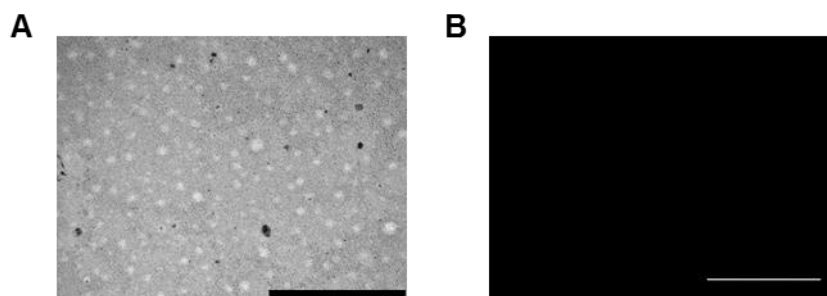

**Supplementary figure 6.** Unassembled Tyr solution. Tyr at a concentration of 0.1 mg/ml was heated to 90° C and cooled down gradually. **(A)** TEM micrograph, scale bar: 1 $\mu$ m. **(B)** Staining with ThT dye as visualized by confocal microscopy, scale bar: 20 $\mu$ m.

## Supplementary methods

### ThT binding assay

Tyr was dissolved at 90°C in PBS at a concentration of 4 mg/ml, followed by gradual cooling of the solution. ThT solution (10  $\mu$ l, 4 mM, PBS x1) was mixed with 10  $\mu$ l of the Tyr solution to a final concentration of 2 mg/ml and placed on a glass microscope slide. The stained samples were visualized using SP8 inverted confocal microscope (Leica Microsystems, Wetzlar, Germany), with excitation and emission wavelengths of 458 and 485 nm, respectively.

### Mass spectroscopy

The Tyr assemblies (2 mg/ml) sample was prepared for mass spectrometry by a 20-fold dilution in water to a final concentration below the solubility limitation of Tyr in water (0.1 mg/ml). Mass spectrometry was recorded using an MALDI-SYNAPT mass spectrometer (Waters, USA).

### UV-Vis spectra

For UV-Vis measurements, 1 mL of Tyr dissolved assemblies (0.1 mg/ml, as described in the mass spectroscopy section) or soluble Tyr at the same concentration (serving as the control) were added to a rectangular quartz cuvette with an optical path-length of 1 cm (Starna). UV-Vis spectra in the range of 250-700 nm were acquired using a T60 spectrophotometer (PG Instruments) at a spectral resolution of 0.2 nm and corrected using PBS as a baseline.
